# Supplementary material for: Dynamic Macronutrient Meal-Equivalent Menu Method: Towards Individual Nutrition Intervention Programs
Source: MDPI journal article supplement (doi:10.3390/mps2030078), 2019-09-05
Supplement: s1 [file s1]

Patient's ID/Name: \_\_\_\_\_

Date: \_\_\_\_\_

Basal Energy Expenditure: \_\_\_\_\_ kcal/day

Caloric Restriction: \_\_\_\_\_ kcal/day

Caloric Addition: \_\_\_\_\_ kcal/day

Total Energy Dietary Plan: \_\_\_\_\_ kcal/day

Protein intake: \_\_\_\_\_ g/kg/day

| Theoretical Dietary Resume Table |     |       |               |
|----------------------------------|-----|-------|---------------|
| Macronutrient                    | %   | Grams | Energy (kcal) |
| 1. Protein                       |     |       |               |
| 2. Fats                          |     |       |               |
| 3. Carbohydrates                 |     |       |               |
| TOTAL                            | 100 | -     |               |

Mealtimes, schedule and standard food servings per day (SFS/d) individual distribution. Number of standard food servings per day, energy and macronutrient calculation format in the macronutrient meal-equivalent menu method.

| Food Group                   | No. SFS/d        | Protein per <sup>a</sup> SFS (g) | <sup>b</sup> Protein in <sup>c</sup> ME (g/d) | Fat per <sup>a</sup> SFS (g) | <sup>b</sup> Fat in <sup>c</sup> ME (g/d) | Carbohydrates per <sup>a</sup> SFS (g) | <sup>b</sup> Carbohydrates in <sup>c</sup> ME (g/d) | Energy per <sup>a</sup> SFS (kcal) | <sup>b</sup> Energy in <sup>c</sup> ME (kcal/d) |
|------------------------------|------------------|----------------------------------|-----------------------------------------------|------------------------------|-------------------------------------------|----------------------------------------|-----------------------------------------------------|------------------------------------|-------------------------------------------------|
| <b>1. Vegetables</b>         |                  | 2                                |                                               | 0                            |                                           | 4                                      |                                                     | 25                                 |                                                 |
| <b>2. Fruits</b>             |                  | 0                                |                                               | 0                            |                                           | 15                                     |                                                     | 60                                 |                                                 |
| <b>3. Cereals</b>            |                  |                                  |                                               |                              |                                           |                                        |                                                     |                                    |                                                 |
| <b>A) Non-fat</b>            |                  | 2                                |                                               | 0                            |                                           | 15                                     |                                                     | 70                                 |                                                 |
| <b>B) With fat</b>           |                  | 2                                |                                               | 5                            |                                           | 15                                     |                                                     | 115                                |                                                 |
| <b>4. Legumes</b>            |                  | 8                                |                                               | 1                            |                                           | 20                                     |                                                     | 120                                |                                                 |
| <b>5. Animal Origin (AO)</b> |                  |                                  |                                               |                              |                                           |                                        |                                                     |                                    |                                                 |
| <b>A) Very low fat</b>       |                  | 7                                |                                               | 1                            |                                           | 0                                      |                                                     | 40                                 |                                                 |
| <b>B) Low fat</b>            |                  | 7                                |                                               | 3                            |                                           | 0                                      |                                                     | 55                                 |                                                 |
| <b>C) Moderate fat</b>       |                  | 7                                |                                               | 5                            |                                           | 0                                      |                                                     | 75                                 |                                                 |
| <b>D) High fat</b>           |                  | 7                                |                                               | 8                            |                                           | 0                                      |                                                     | 100                                |                                                 |
| <b>6. Milk</b>               |                  |                                  |                                               |                              |                                           |                                        |                                                     |                                    |                                                 |
| <b>A) Low fat</b>            |                  | 9                                |                                               | 2                            |                                           | 12                                     |                                                     | 95                                 |                                                 |
| <b>B) Reduced fat</b>        |                  | 9                                |                                               | 4                            |                                           | 12                                     |                                                     | 110                                |                                                 |
| <b>C) Whole</b>              |                  | 9                                |                                               | 8                            |                                           | 12                                     |                                                     | 150                                |                                                 |
| <b>D) With sugar</b>         |                  | 8                                |                                               | 5                            |                                           | 30                                     |                                                     | 200                                |                                                 |
| <b>7. Fats</b>               |                  |                                  |                                               |                              |                                           |                                        |                                                     |                                    |                                                 |
| <b>A) Without protein</b>    |                  | 0                                |                                               | 5                            |                                           | 0                                      |                                                     | 45                                 |                                                 |
| <b>B) With protein</b>       |                  | 3                                |                                               | 5                            |                                           | 3                                      |                                                     | 70                                 |                                                 |
| <b>8. Sugars</b>             |                  |                                  |                                               |                              |                                           |                                        |                                                     |                                    |                                                 |
| <b>A) Non-fat</b>            |                  | 0                                |                                               | 0                            |                                           | 10                                     |                                                     | 40                                 |                                                 |
| <b>B) With fat</b>           |                  | 0                                |                                               | 5                            |                                           | 10                                     |                                                     | 85                                 |                                                 |
| <b>TOTAL</b>                 | <sup>d</sup> N/A | <sup>d</sup> N/A                 |                                               | <sup>d</sup> N/A             |                                           | <sup>d</sup> N/A                       |                                                     | <sup>d</sup> N/A                   |                                                 |

<sup>a</sup>Standard Food Servings (SFS) according to the Mexican food equivalent lists (SMAE) [27] which corresponds to the kcal and grams provided by each SFS food group; <sup>b</sup>Obtained macronutrient g/d or kcal/d by multiplying SFS content with No. SFS; <sup>c</sup>ME: macronutrient meal-equivalent menu; <sup>d</sup>N/A: not applicable; Acceptable variations for calculated energy and macronutrient content are: <sup>e</sup>protein  $\pm 1$ g/d; <sup>f</sup>total fat  $\pm 1$ g/d; <sup>g</sup>carbohydrates  $\pm 2$ g/d; <sup>h</sup>energy  $\pm 15$  kcal/d.

**Mealtimes, schedule and standard food servings per day (SFS/d) individual distribution planification sheet.**

**Number of meals per day regularly done by the patient: \_\_\_\_\_ Number of meals suggested per day: \_\_\_\_\_**

| Schedule              |           |                     |                     |                     |                     |                     |
|-----------------------|-----------|---------------------|---------------------|---------------------|---------------------|---------------------|
| Food Group            | No. SFS/d | Meal 1<br>No. SFS/d | Meal 2<br>No. SFS/d | Meal 3<br>No. SFS/d | Meal 4<br>No. SFS/d | Meal 5<br>No. SFS/d |
| 1. Vegetables         |           |                     |                     |                     |                     |                     |
| 2. Fruits             |           |                     |                     |                     |                     |                     |
| 3. Cereals            |           |                     |                     |                     |                     |                     |
| A) Non-fat            |           |                     |                     |                     |                     |                     |
| B) With fat           |           |                     |                     |                     |                     |                     |
| 4. Legumes            |           |                     |                     |                     |                     |                     |
| 5. Animal Origin (AO) |           |                     |                     |                     |                     |                     |
| A) Very low fat       |           |                     |                     |                     |                     |                     |
| B) Low fat            |           |                     |                     |                     |                     |                     |
| C) Moderate fat       |           |                     |                     |                     |                     |                     |
| D) High fat           |           |                     |                     |                     |                     |                     |
| 6. Milk               |           |                     |                     |                     |                     |                     |
| A) Low fat            |           |                     |                     |                     |                     |                     |
| B) Reduced fat        |           |                     |                     |                     |                     |                     |
| C) Whole              |           |                     |                     |                     |                     |                     |
| D) With sugar         |           |                     |                     |                     |                     |                     |
| 7. Fats               |           |                     |                     |                     |                     |                     |
| A) Without protein    |           |                     |                     |                     |                     |                     |
| B) With protein       |           |                     |                     |                     |                     |                     |
| 8. Sugars             |           |                     |                     |                     |                     |                     |
| A) Non-fat            |           |                     |                     |                     |                     |                     |
| B) With fat           |           |                     |                     |                     |                     |                     |

**Patient's ID/Name:** \_\_\_\_\_

Date: \_\_\_\_\_

Instructions: each row specifies what to eat at each meal time. You may choose a single box in each row and all within the same meal time are equivalent and exchangeable.

[illegible]
