# Supplementary material for: Dynamic Macronutrient Meal-Equivalent Menu Method: Towards Individual Nutrition Intervention Programs
Source: MDPI journal article supplement (doi:10.3390/mps2030078), 2019-09-05
Supplement: s1 [file s1]

**Instructions:** each row specifies what to eat at each meal time. You may choose a single box in each row and all within the same meal time are equivalent and exchangeable.

| TIME       | 1                                                                                                                                                                                                                                                                                                                                                                                                                                  | 2                                                                                                                                                                                                                                                                                                                                                              | 3                                                                                                                                                                                                                                                                                                                                                                      | 4                                                                                                                                                                                                                                                                                                                                                                                          | 5                                                                                                                                                                                                                                                                                                                                                              | 6                                                                                                                                                                                                                                                                | 7                                                                                                                                                                                                                                                                                                                                                                                                                             |
|------------|------------------------------------------------------------------------------------------------------------------------------------------------------------------------------------------------------------------------------------------------------------------------------------------------------------------------------------------------------------------------------------------------------------------------------------|----------------------------------------------------------------------------------------------------------------------------------------------------------------------------------------------------------------------------------------------------------------------------------------------------------------------------------------------------------------|------------------------------------------------------------------------------------------------------------------------------------------------------------------------------------------------------------------------------------------------------------------------------------------------------------------------------------------------------------------------|--------------------------------------------------------------------------------------------------------------------------------------------------------------------------------------------------------------------------------------------------------------------------------------------------------------------------------------------------------------------------------------------|----------------------------------------------------------------------------------------------------------------------------------------------------------------------------------------------------------------------------------------------------------------------------------------------------------------------------------------------------------------|------------------------------------------------------------------------------------------------------------------------------------------------------------------------------------------------------------------------------------------------------------------|-------------------------------------------------------------------------------------------------------------------------------------------------------------------------------------------------------------------------------------------------------------------------------------------------------------------------------------------------------------------------------------------------------------------------------|
| 8:00 a.m.  | <b>Banana</b><br>- 1 piece (2 Fruit SFS)                                                                                                                                                                                                                                                                                                                                                                                           | <b>Strawberry Papaya smoothie</b><br>- 1 cup strawberries (1 Fruit SFS)<br>- 1 cup papaya (1 Fruit SFS)                                                                                                                                                                                                                                                        | <b>Pear</b><br>- 1 piece (2 Fruit SFS)                                                                                                                                                                                                                                                                                                                                 | <b>Grapes</b><br>- 36 pieces (2 Fruit SFS)                                                                                                                                                                                                                                                                                                                                                 | <b>Apple</b><br>- 1 piece (1 Fruit SFS)<br><b>Kiwi</b><br>- 1 piece (1 Fruit SFS)                                                                                                                                                                                                                                                                              | <b>Grapefruit</b><br>- 1 piece (1 Fruit SFS)<br><b>Watermelon</b><br>- 1 cup watermelon (1 Fruit SFS)                                                                                                                                                            | <b>Berries</b><br>- 1 cup berry mix (1 Fruit SFS)<br><b>Melon</b><br>- 1 cup melon (1 Fruit SFS)                                                                                                                                                                                                                                                                                                                              |
|            | <b>Pancakes</b><br>- 2 small pieces of 40g each (2 Cereal B SFS)<br>- 1 tsp. butter (1 Fat A SFS)<br>- 3 tsp. maple syrup (1.5 Sugar A SFS)                                                                                                                                                                                                                                                                                        | <b>Toasted bread with jam and butter</b><br>- 2 whole wheat bread slices<br>- 3 tsp. butter (2 Cereal B SFS + 1 Fat A SFS)<br>- 3 tsp. jam (1.5 Sugar SFS)                                                                                                                                                                                                     | <b>Waffle</b><br>- 2 small pieces of 40g each (2 Cereal B SFS)<br>- 1 tsp. butter (1 Fat A SFS)<br>- 3 tsp. maple syrup (1.5 Sugar SFS)                                                                                                                                                                                                                                | <b>Toasted bread with jam and cream cheese</b><br>- 2 whole wheat bread slices<br>- 3 tsp. cream cheese (2 Cereal B SFS + 1 Fat A SFS)<br>- 4 tsp. jam (1.5 Sugar SFS)                                                                                                                                                                                                                     | <b>Croissant</b><br>- 1 piece of 60g (2 Cereal B SFS + 1 Fat A SFS)<br>- 4 tsp. jam (1.5 Sugar SFS)                                                                                                                                                                                                                                                            | <b>Apple Strudel</b><br>- 1 piece of 70g (2 Cereal B SFS + 1 Fat A SFS)<br>- 4 tsp. jam (1.5 Sugar SFS)                                                                                                                                                          | <b>Bagel with jam and cream cheese</b><br>- 1 whole wheat bagel of 50g<br>- 3 tsp. cream cheese (2 Cereal B SFS + 1 Fat A SFS)<br>- 4 tsp. jam (1.5 Sugar SFS)                                                                                                                                                                                                                                                                |
| 11:00 a.m. | <b>Grapes</b><br>- 18 pieces (1 Fruit SFS)                                                                                                                                                                                                                                                                                                                                                                                         | <b>Apple</b><br>- 1 piece (1 Fruit SFS)                                                                                                                                                                                                                                                                                                                        | <b>Melon</b><br>- 1 cup melon (1 Fruit SFS)                                                                                                                                                                                                                                                                                                                            | <b>Orange</b><br>- 2 pieces (1 Fruit SFS)                                                                                                                                                                                                                                                                                                                                                  | <b>Watermelon</b><br>- 1 cup watermelon (1 Fruit SFS)                                                                                                                                                                                                                                                                                                          | <b>Tangerine</b><br>- 2 pieces (1 Fruit SFS)                                                                                                                                                                                                                     | <b>Strawberries</b><br>- 1 cup (1 Fruit SFS)                                                                                                                                                                                                                                                                                                                                                                                  |
|            | <b>Almonds</b> – 10 pieces (1 Fat B SFS)<br><b>Crystallized Fruit</b> – 3 pieces (1 Sugar SFS)                                                                                                                                                                                                                                                                                                                                     | <b>Peanut Butter</b> – 1 tbsp. (1 Fat B SFS)<br><b>Marshmallows</b> – 2 big pieces (15g) (1 Sugar SFS)                                                                                                                                                                                                                                                         | <b>Pistachio</b> – 18 pieces (1 Fat B SFS)<br><b>Lolly Pop</b> – 1 piece (1 Sugar SFS)                                                                                                                                                                                                                                                                                 | <b>Honey Roasted Peanuts</b> – 15 pieces (1 Fat B SFS + 1 Sugar SFS)                                                                                                                                                                                                                                                                                                                       | <b>Nuts</b> – 3 pieces (1 Fat B SFS)<br><b>Jelly</b> – ½ cup (1 Sugar SFS)                                                                                                                                                                                                                                                                                     | <b>Almond Butter</b> – 1 tbsp. (1 Fat B SFS)<br><b>Mini Marshmallows</b> – 18 pieces (15g) (1 Sugar SFS)                                                                                                                                                         | <b>Hazelnut Cream</b> – 1 tbsp. (1 Fat B SFS + 1 Sugar SFS)                                                                                                                                                                                                                                                                                                                                                                   |
| 2:00 p.m.  | <b>Watermelon Water</b><br>- 1 cup watermelon (1 Fruit SFS)<br>- 2 tsp. sugar (1 Sugar SFS)<br>- Free amount of water                                                                                                                                                                                                                                                                                                              | <b>Pineapple-Cucumber Water</b><br>- 1 cup pineapple (1 Fruit SFS)<br>- 2 tsp. sugar (1 Sugar SFS)<br>- Free amount of water<br>- ½ cucumber piece (1/2 Vegetable SFS)<br>- ½ lemon piece                                                                                                                                                                      | <b>Strawberry Lemonade</b><br>- 1 cup strawberries (1 Fruit SFS)<br>- 2 tsp. sugar (1 Sugar SFS)<br>- Free amount of water<br>- 1 lemon piece                                                                                                                                                                                                                          | <b>Kiwi Lemonade</b><br>- 1 kiwi (1 Fruit SFS)<br>- 2 tsp. sugar (1 Sugar SFS)<br>- Free amount of water<br>- 1 lemon piece                                                                                                                                                                                                                                                                | <b>Tangerine Water</b><br>- 2 tangerine pieces (1 Fruit SFS)<br>- 2 tsp. sugar (1 Sugar SFS)<br>- Free amount of water                                                                                                                                                                                                                                         | <b>Berry Lemonade</b><br>- 1 cup berries (1 Fruit SFS)<br>- 2 tsp. sugar (1 Sugar SFS)<br>- Free amount of water<br>- 1 lemon piece                                                                                                                              | <b>Orange Water</b><br>- 1 orange piece (1 Fruit SFS)<br>- 2 tsp. sugar (1 Sugar SFS)<br>- Free amount of water                                                                                                                                                                                                                                                                                                               |
|            | <b>Avocado Green Salad</b><br>- 1/3 avocado piece (1 Fat A SFS)<br>- 1 cup vegetables: spinach, cucumber, bell pepper and alfalfa (1 Vegetable SFS)<br><b>Chicken Fajitas</b><br>- 50g chicken breast (2 AO A SFS)<br>- 1 tsp. oil (1 Fat A SFS)<br>- 1 cup vegetables: Bell pepper, onion and mushrooms (1 Vegetable SFS)<br><b>Whole Beans</b><br>- ½ cup (1 Leguminous SFS)<br><b>Steamed Pasta</b><br>- 1 cup (2 Cereal A SFS) | <b>Asparagus with Butter</b><br>- 1 tsp. butter (1 Fat A SFS)<br>- 1 cup asparagus (1 Vegetable SFS)<br><b>Pan Seared Salmon</b><br>- 60g salmon (2 AO A SFS)<br>- 1 tsp. oil (1 Fat A SFS)<br>- 1 cup vegetables: spinach and mushrooms (1 Vegetable SFS)<br><b>Lentils</b><br>- ½ cup (1 Leguminous SFS)<br><b>Steamed Pasta</b><br>- 1 cup (2 Cereal A SFS) | <b>Caesar's Salad with Chicken</b><br>- 40g chicken breast (1 AO A SFS)<br>- 3 cups lettuce (1 Vegetable SFS)<br>- 2 tsp. parmesan cheese (1 AO A SFS + ½ Fat SFS)<br>- 1 tsp. ranch dressing (2 Fat SFS)<br>- 1 cup bread croutons (2 Cereal SFS)<br><b>Garlic-cilantro black bean salad</b><br>- Free amount garlic and cilantro<br>- ½ cup beans (1 Leguminous SFS) | <b>Chickpea Salad</b><br>- 1 cup vegetables: carrot, mushrooms, tomato, (1 Vegetable SFS)<br>- ½ cup chickpea (1 Leguminous SFS)<br>- 1 tsp. olive oil (1 Fat A SFS)<br>- 1/3 avocado piece (1 Fat A SFS)<br><b>Lasagna</b><br>- 1 cup of steamed pasta (2 Cereal SFS)<br>- 30g cooked ground beef (1 AO A SFS)<br>- 40g mozzarella (1 AO A SFS)<br>- ½ cup tomato sauce (1 Vegetable SFS) | <b>Spinach with whole beans</b><br>- ½ cup beans (1 Leguminous SFS)<br>- 2 tsp. oil (2 Fat A SFS)<br>- 1 cup vegetables: spinach, onion and garlic (1 Vegetable SFS)<br><b>Chicken noodle soup</b><br>- 50g chicken breast (2 AO A SFS)<br>- 1 cup vegetables: carrot, pumpkin, Garlic, onion and celery (1 Vegetable SFS)<br>- 1 cup noodles (2 Cereal A SFS) | <b>Lentils</b><br>- ½ cup (1 Leguminous SFS)<br><b>Chicken Stew</b><br>- 50g chicken breast (2 AO A SFS)<br>- 2 tsp. avocado oil (2 Fat A SFS)<br>- 1 cup steamed vegetables (carrot, onion, pea, tomato) (2 Vegetable SFS)<br>- 1 baked potato (2 Cereal A SFS) | <b>Avocado Salad</b><br>- 1/3 avocado piece (1 Fat A SFS)<br>- 2 cups vegetables: spinach, cucumber, tomato, mushrooms, bell pepper and alfalfa (2 Vegetable SFS)<br><b>Lemon pepper fish</b><br>- 80g tilapia (2 AO A SFS)<br>- Free amount lemon juice, garlic and pepper<br>- 1 tsp. olive oil (1 Fat A SFS)<br><b>Cooked brown rice</b><br>- 2/3 cup (2 Cereal A SFS)<br><b>Whole Beans</b><br>- ½ cup (1 Leguminous SFS) |
|            | <b>Apple</b><br>- 1 piece (1 Fruit SFS)                                                                                                                                                                                                                                                                                                                                                                                            | <b>Melon</b><br>- 1 cup melon (1 Fruit SFS)                                                                                                                                                                                                                                                                                                                    | <b>Orange</b><br>- 2 pieces (1 Fruit SFS)                                                                                                                                                                                                                                                                                                                              | <b>Watermelon</b><br>- 1 cup watermelon (1 Fruit SFS)                                                                                                                                                                                                                                                                                                                                      | <b>Tangerine</b><br>- 2 pieces (1 Fruit SFS)                                                                                                                                                                                                                                                                                                                   | <b>Strawberries</b><br>- 1 cup (1 Fruit SFS)                                                                                                                                                                                                                     | <b>Grapes</b><br>- 18 pieces (1 Fruit SFS)                                                                                                                                                                                                                                                                                                                                                                                    |
|            | <b>Orange</b><br>- 2 pieces (1 Fruit SFS)<br><b>Pistachios</b> – 18 pieces (1 Fat B SFS)                                                                                                                                                                                                                                                                                                                                           | <b>Watermelon</b><br>- 1 cup watermelon (1 Fruit SFS)<br><b>Nuts</b> – 3 pieces (1 Fat B SFS)                                                                                                                                                                                                                                                                  | <b>Tangerine</b><br>- 2 pieces (1 Fruit SFS)<br><b>Peanuts</b> – 15 pieces (1 Fat B SFS)                                                                                                                                                                                                                                                                               | <b>Strawberries</b><br>- 1 cup (1 Fruit SFS)<br><b>Almond Butter</b> – 1 tbsp. (1 Fat B SFS)                                                                                                                                                                                                                                                                                               | <b>Grapes</b><br>- 18 pieces (1 Fruit SFS)<br><b>Almonds</b> – 10 pieces (1 Fat B SFS)                                                                                                                                                                                                                                                                         | <b>Apple</b><br>- 1 piece (1 Fruit SFS)<br><b>Peanut Butter</b> – 1 tbsp. (1 Fat B SFS)                                                                                                                                                                          | <b>Melon</b><br>- 1 cup melon (1 Fruit SFS)<br><b>Sesame</b> – 4 tsp. (1 Fat B SFS)                                                                                                                                                                                                                                                                                                                                           |
| 8:00 p.m.  | <b>Tomato</b> – 1 piece (1 Vegetable SFS)                                                                                                                                                                                                                                                                                                                                                                                          | <b>Cucumber</b> – 1 cup (1 Vegetable SFS)                                                                                                                                                                                                                                                                                                                      | <b>Lettuce</b> – 3 cups (1 Vegetable SFS)                                                                                                                                                                                                                                                                                                                              | <b>Spinach</b> – 1 cup (1 Vegetable SFS)                                                                                                                                                                                                                                                                                                                                                   | <b>Carrot</b> – 1 cup (1 Vegetable SFS)                                                                                                                                                                                                                                                                                                                        | <b>Bell pepper</b> – 1 cup (1 Vegetable SFS)                                                                                                                                                                                                                     | <b>Alfalfa</b> – 1 cup (1 Vegetable SFS)                                                                                                                                                                                                                                                                                                                                                                                      |
|            | <b>Boiled egg</b><br>- 2 egg whites (1 AO A SFS)<br><b>Toasted bread with butter</b><br>- 1 slice of whole bread (1 Cereal A SFS)<br>- 1 tbsp. butter (1 Fat A SFS)                                                                                                                                                                                                                                                                | <b>Avocado Tuna</b><br>- 30g tuna (1 AO A SFS)<br>- 1/3 avocado (1 Fat A SFS)<br>- 1 slice whole bread (1 Cereal A SFS)                                                                                                                                                                                                                                        | <b>Sandwich</b><br>- 25g ham (1 AO A SFS)<br>- 1 tsp. mayonnaise (1 Fat A SFS)<br>- 1 slice whole bread (1 Cereal A SFS)                                                                                                                                                                                                                                               | <b>Cheese Avocado sandwich</b><br>- 40g low fat cheese mozzarella (1 AO A SFS)<br>- 1/3 avocado (1 Fat A SFS)<br>- 1 slice whole bread (1 Cereal A SFS)                                                                                                                                                                                                                                    | <b>Sushi</b><br>- 30g tuna (1 AO A SFS)<br>- 1/3 avocado (1 Fat A SFS)<br>- 1/3 cup rice (1 Cereal A SFS)                                                                                                                                                                                                                                                      | <b>Flat Bread Pizza</b><br>- 40g low fat cheese mozzarella (1 AO A SFS)<br>- 1 bacon slice (1 Fat A SFS)<br>- ½ flat bread – (1 Cereal A SFS)                                                                                                                    | <b>Wrap Avocado</b><br>- 40g low fat cheese mozzarella (1 AO A SFS)<br>- 1/3 avocado (1 Fat A SFS)<br>- ½ flat bread (1 Cereal A SFS)                                                                                                                                                                                                                                                                                         |
