# Supplementary material for: Dynamic Macronutrient Meal-Equivalent Menu Method: Towards Individual Nutrition Intervention Programs
Source: MDPI journal article supplement (doi:10.3390/mps2030078), 2019-09-05
Supplement: s1 [file s1]

| Food Group            | No. SFS/d        | Protein per <sup>a</sup> SFS (g) | <sup>b</sup> Protein in <sup>c</sup> ME (g/d) | Fat per <sup>a</sup> SFS (g) | <sup>b</sup> Fat in <sup>c</sup> ME (g/d) | Carbohydrates per <sup>a</sup> SFS (g) | <sup>b</sup> Carbohydrates in <sup>c</sup> ME (g/d) | Energy per <sup>a</sup> SFS (kcal) | <sup>b</sup> Energy in <sup>c</sup> ME (kcal/d) |
|-----------------------|------------------|----------------------------------|-----------------------------------------------|------------------------------|-------------------------------------------|----------------------------------------|-----------------------------------------------------|------------------------------------|-------------------------------------------------|
| 1. Vegetables         | 3                | 2                                | 6                                             | 0                            | 0                                         | 4                                      | 12                                                  | 25                                 | 75                                              |
| 2. Fruits             | 6                | 0                                | 0                                             | 0                            | 0                                         | 15                                     | 90                                                  | 60                                 | 360                                             |
| 3. Cereals            |                  |                                  |                                               |                              |                                           |                                        |                                                     |                                    |                                                 |
| A) Non-fat            | 3                | 2                                | 6                                             | 0                            | 0                                         | 15                                     | 45                                                  | 70                                 | 210                                             |
| B) With fat           | 2                | 2                                | 4                                             | 5                            | 10                                        | 15                                     | 30                                                  | 115                                | 230                                             |
| 4. Legumes            | 1                | 8                                | 8                                             | 1                            | 1                                         | 20                                     | 20                                                  | 120                                | 120                                             |
| 5. Animal Origin (AO) |                  |                                  |                                               |                              |                                           |                                        |                                                     |                                    |                                                 |
| A) Very low fat       | 1                | 7                                | 7                                             | 1                            | 1                                         | 0                                      | 0                                                   | 40                                 | 40                                              |
| B) Low fat            | 2                | 7                                | 14                                            | 3                            | 6                                         | 0                                      | 0                                                   | 55                                 | 110                                             |
| C) Moderate fat       | 0                | 7                                | 0                                             | 5                            | 0                                         | 0                                      | 0                                                   | 75                                 | 0                                               |
| D) High fat           | 0                | 7                                | 0                                             | 8                            | 0                                         | 0                                      | 0                                                   | 100                                | 0                                               |
| 6. Milk               |                  |                                  |                                               |                              |                                           |                                        |                                                     |                                    |                                                 |
| A) Low fat            | 0                | 9                                | 0                                             | 2                            | 0                                         | 12                                     | 0                                                   | 95                                 | 0                                               |
| B) Reduced fat        | 0                | 9                                | 0                                             | 4                            | 0                                         | 12                                     | 0                                                   | 110                                | 0                                               |
| C) Whole              | 0                | 9                                | 0                                             | 8                            | 0                                         | 12                                     | 0                                                   | 150                                | 0                                               |
| D) With sugar         | 0                | 8                                | 0                                             | 5                            | 0                                         | 30                                     | 0                                                   | 200                                | 0                                               |
| 7. Fats               |                  |                                  |                                               |                              |                                           |                                        |                                                     |                                    |                                                 |
| A) Without protein    | 4                | 0                                | 0                                             | 5                            | 20                                        | 0                                      | 0                                                   | 45                                 | 180                                             |
| B) With protein       | 2                | 3                                | 6                                             | 5                            | 10                                        | 3                                      | 6                                                   | 70                                 | 140                                             |
| 8. Sugars             |                  |                                  |                                               |                              |                                           |                                        |                                                     |                                    |                                                 |
| A) Non-fat            | 3.5              | 0                                | 0                                             | 0                            | 0                                         | 10                                     | 35                                                  | 40                                 | 140                                             |
| B) With fat           | 0                | 0                                | 0                                             | 5                            | 0                                         | 10                                     | 0                                                   | 85                                 | 0                                               |
| <b>TOTAL</b>          | <sup>d</sup> N/A | <sup>d</sup> N/A                 | <sup>e</sup> 51                               | <sup>d</sup> N/A             | <sup>f</sup> 48                           | <sup>d</sup> N/A                       | <sup>g</sup> 238                                    | <sup>d</sup> N/A                   | <sup>h</sup> 1605                               |

i.e. 1600 kcal diet plan, 50g/d protein, 49g/d fat, 240g/d carbohydrates; <sup>a</sup>Standard Food Servings (SFS) according to the Mexican food equivalent lists (SAME) [27] which corresponds to the kcal and grams provided by each SFS food group; <sup>b</sup>Obtained macronutrient g/d or kcal/d by multiplying SFS content with No. SFS; <sup>c</sup>ME: macronutrient meal-equivalent menu; <sup>d</sup>N/A: not applicable; Acceptable variations for calculated energy and macronutrient content are: <sup>e</sup>protein  $\pm 1$ g/d; <sup>f</sup>total fat  $\pm 1$ g/d; <sup>g</sup>carbohydrates  $\pm 2$ g/d; <sup>h</sup>energy  $\pm 15$  kcal/d.
