# Supplementary material for: Dynamic Macronutrient Meal-Equivalent Menu Method: Towards Individual Nutrition Intervention Programs
Source: MDPI journal article supplement (doi:10.3390/mps2030078), 2019-09-05
Supplement: s1 [file s1]

| Schedule              |           | 8:00 a.m.              | 11:00 p.m.           | 2:00 p.m.          | 5:00 p.m.            | 8:00 p.m.           |
|-----------------------|-----------|------------------------|----------------------|--------------------|----------------------|---------------------|
| Food Group            | No. SFS/d | Breakfast<br>No. SFS/d | Snack 1<br>No. SFS/d | Lunch<br>No. SFS/d | Snack 2<br>No. SFS/d | Dinner<br>No. SFS/d |
| 1. Vegetables         | 3         | 0                      | 0                    | 2                  | 0                    | 1                   |
| 2. Fruits             | 6         | 2                      | 1                    | 2                  | 1                    | 0                   |
| 3. Cereals            |           |                        |                      |                    |                      |                     |
| A) Non-fat            | 3         | 0                      | 0                    | 2                  | 0                    | 1                   |
| B) With fat           | 2         | 2                      | 0                    | 0                  | 0                    | 0                   |
| 4. Legumes            | 1         | 0                      | 0                    | 1                  | 0                    | 0                   |
| 5. Animal Origin (AO) |           |                        |                      |                    |                      |                     |
| A) Very low fat       | 1         | 0                      | 0                    | 0                  | 0                    | 1                   |
| B) Low fat            | 2         | 0                      | 0                    | 2                  | 0                    | 0                   |
| C) Moderate fat       | 0         | 0                      | 0                    | 0                  | 0                    | 0                   |
| D) High fat           | 0         | 0                      | 0                    | 0                  | 0                    | 0                   |
| 6. Milk               |           |                        |                      |                    |                      |                     |
| A) Low fat            | 0         | 0                      | 0                    | 0                  | 0                    | 0                   |
| B) Reduced fat        | 0         | 0                      | 0                    | 0                  | 0                    | 0                   |
| C) Whole              | 0         | 0                      | 0                    | 0                  | 0                    | 0                   |
| D) With sugar         | 0         | 0                      | 0                    | 0                  | 0                    | 0                   |
| 7. Fats               |           |                        |                      |                    |                      |                     |
| A) Without protein    | 4         | 1                      | 0                    | 2                  | 0                    | 1                   |
| B) With protein       | 2         | 0                      | 1                    | 0                  | 1                    | 0                   |
| 8. Sugars             |           |                        |                      |                    |                      |                     |
| A) Non-fat            | 3.5       | 1.5                    | 1                    | 1                  | 0                    | 0                   |
| B) With fat           | 0         | 0                      | 0                    | 0                  | 0                    | 0                   |

i.e. same individual example as in Table 1. Standard food servings (SFS) according to the Mexican food equivalent exchange lists (SMAE) [27].
